# Supplementary material
Source: PubMed Central journal article supplement (PMC7385426)
Supplement: CJP_AUD_Supplementary_Table.pdf [file CJP_AUD_Supplementary_Table.pdf]

**List of Deployment-Related Traumatic Events Assessed in the Canadian Forces Mental Health Survey (2013)**

- Known someone seriously injured or killed.
- Been in a life threatening situation but were unable to respond due to rules of engagement.
- Ever been injured.
- Seen ill or injured women or children that you were unable to help.
- Received incoming artillery, rocket or mortar fire.
- Felt responsible for the death of Canadian or ally personnel.
- Had difficulty distinguishing combatants from non-combatants.
